# Supplementary material
Source: MDPI journal article supplement (https://www.mdpi.com/2225-1154/10/10/148)
Supplement: s1 [file s1]

# Evolution and Trends of Meteorological Drought and Wet Events over the Republic of Djibouti from 1961 to 2021

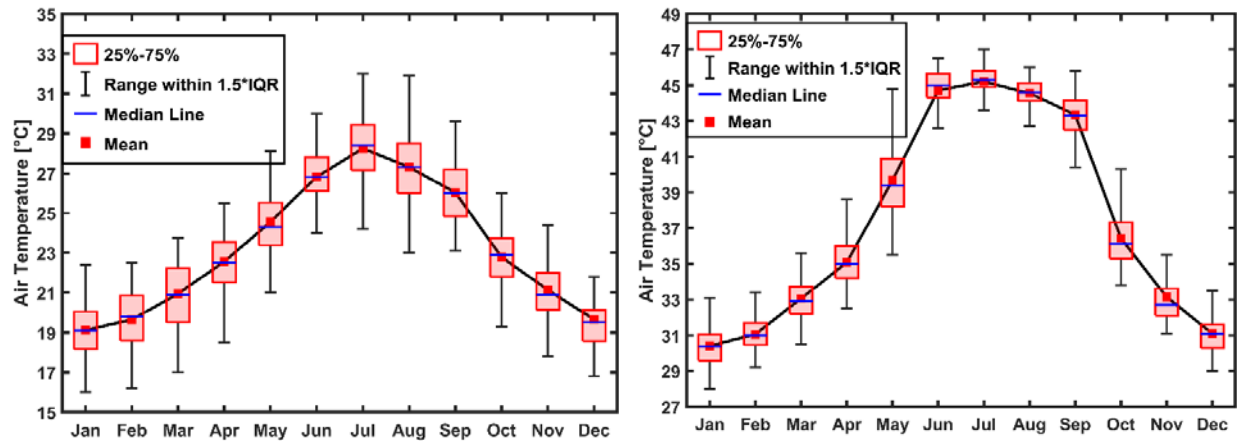

**Figure S1:** Minimum (a) and maximum (b) mean air temperature at the airport-station during 1961-2021 at the airport station.

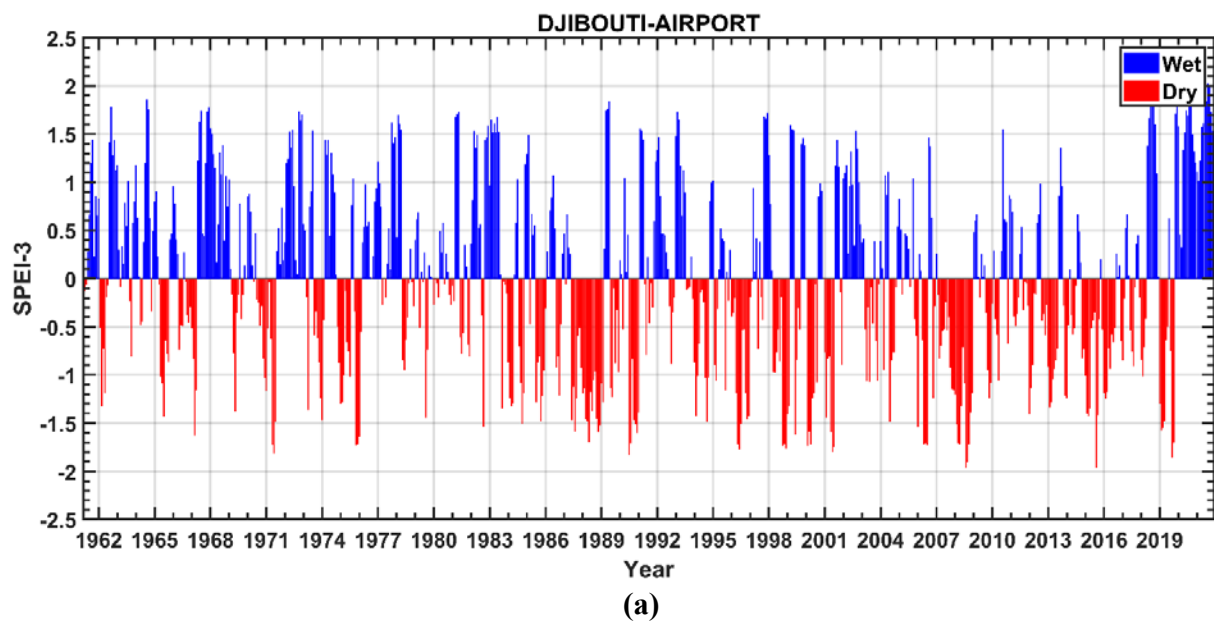

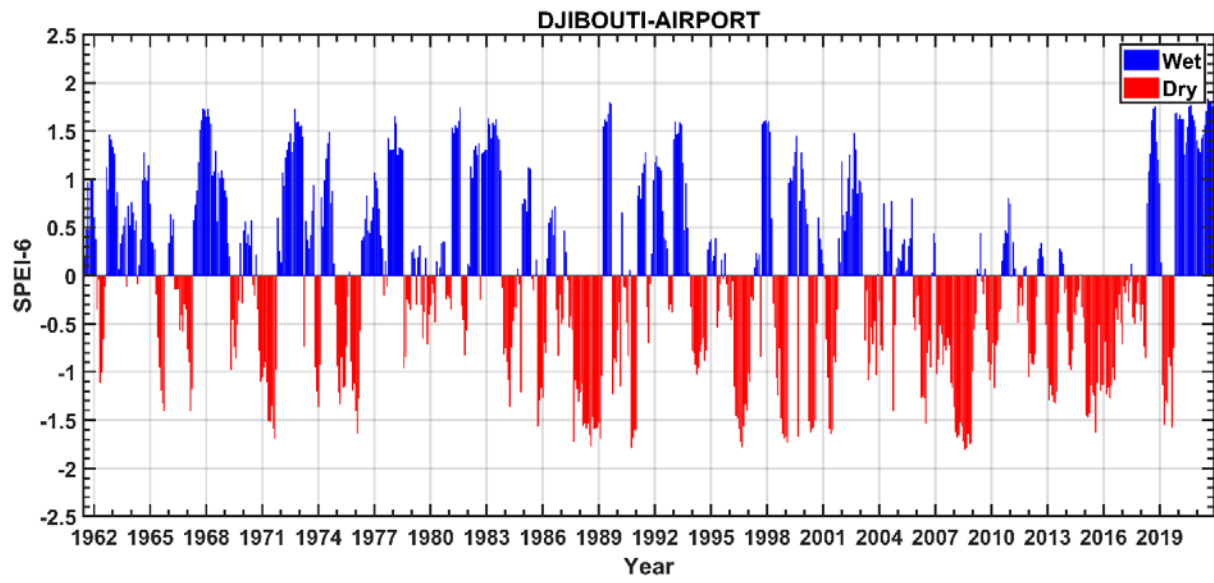

(b)

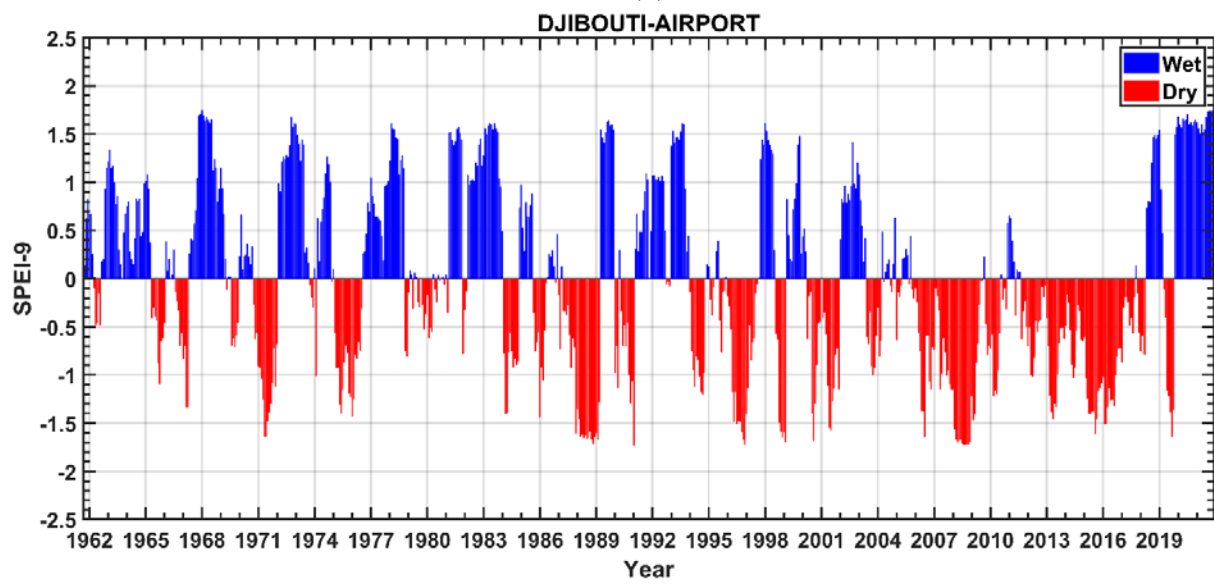

(c)

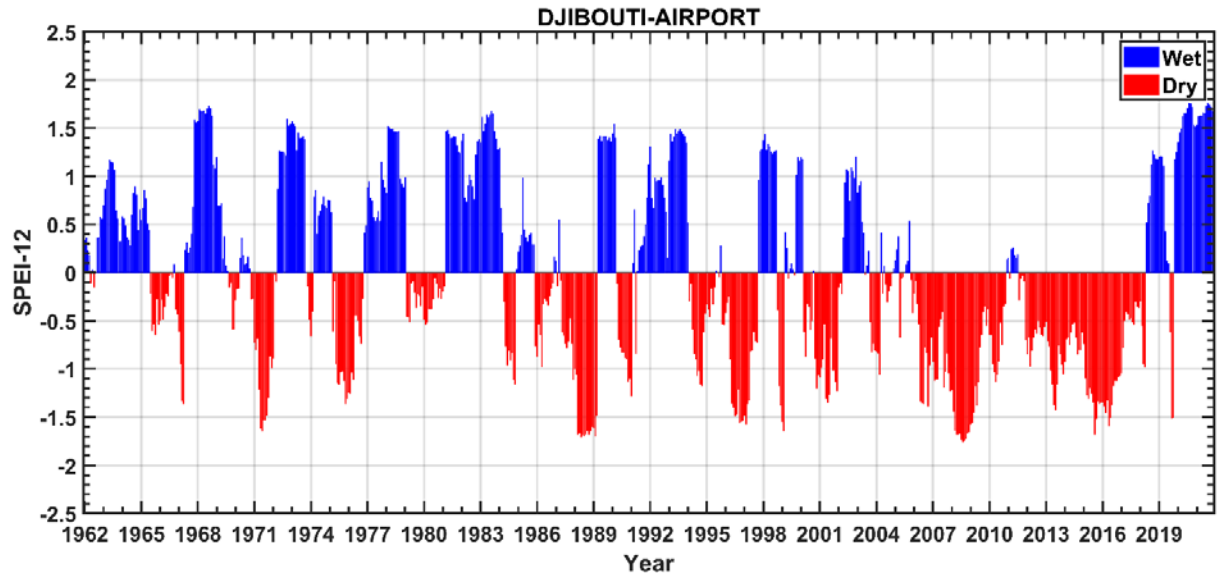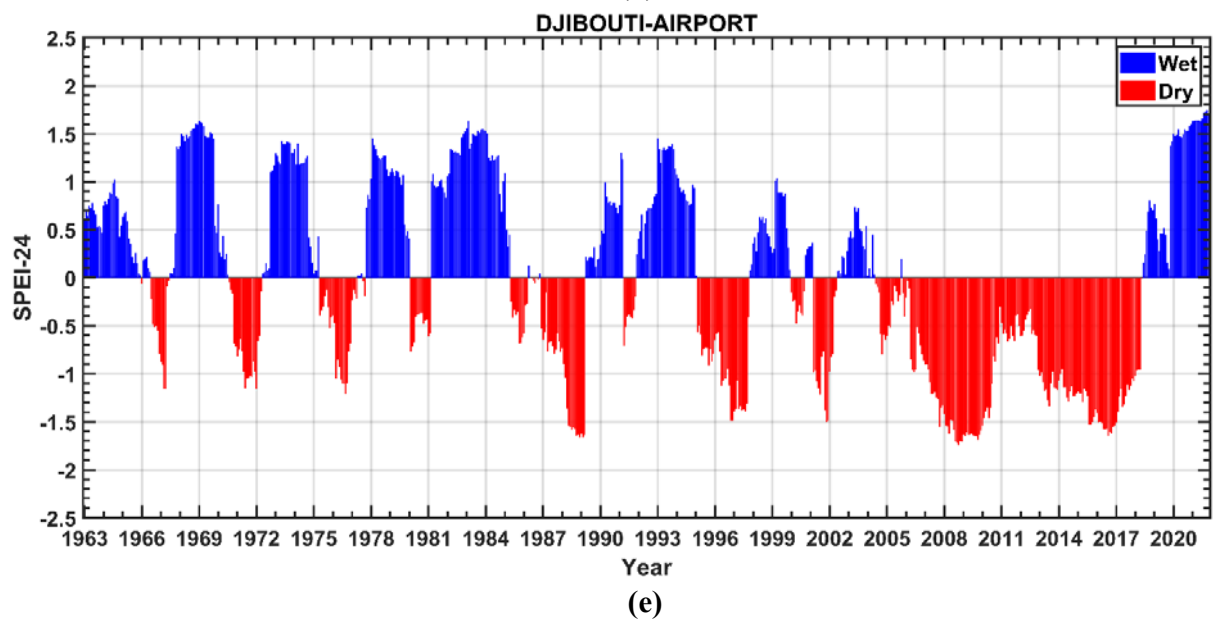

**Figure S2.** Temporal variation of dry events (red color) and wet event (blue color) for SPEI short-term and long-term during the period 1961–2021: (a) SPEI-3, (b) SPEI-6, (c) SPEI-9, (d) SPEI-12 and (e) SPEI-24.

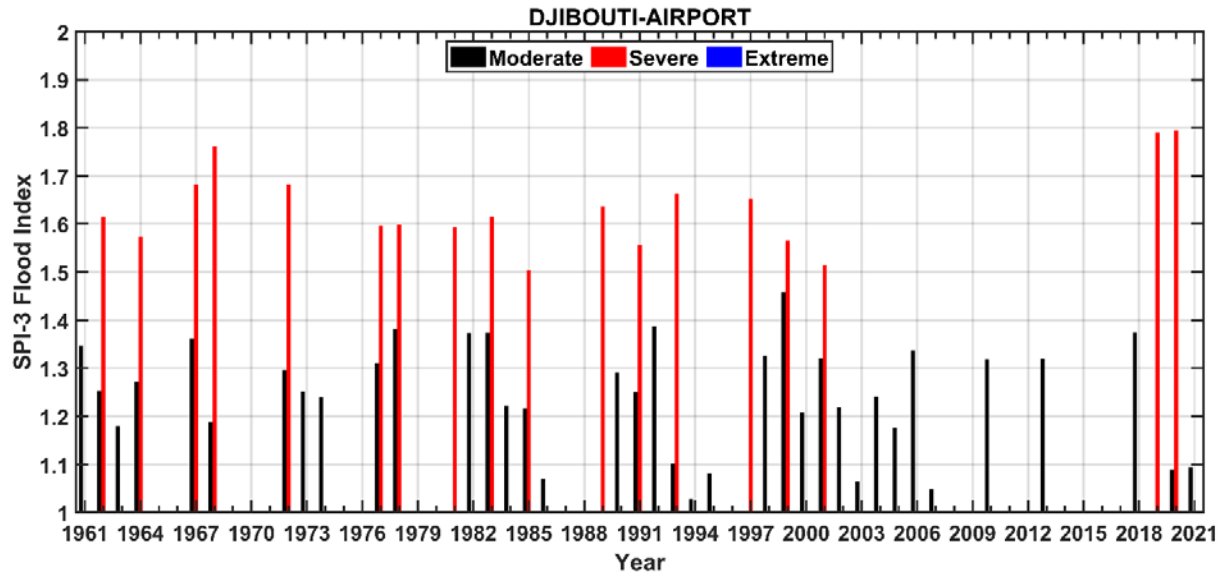

(a)

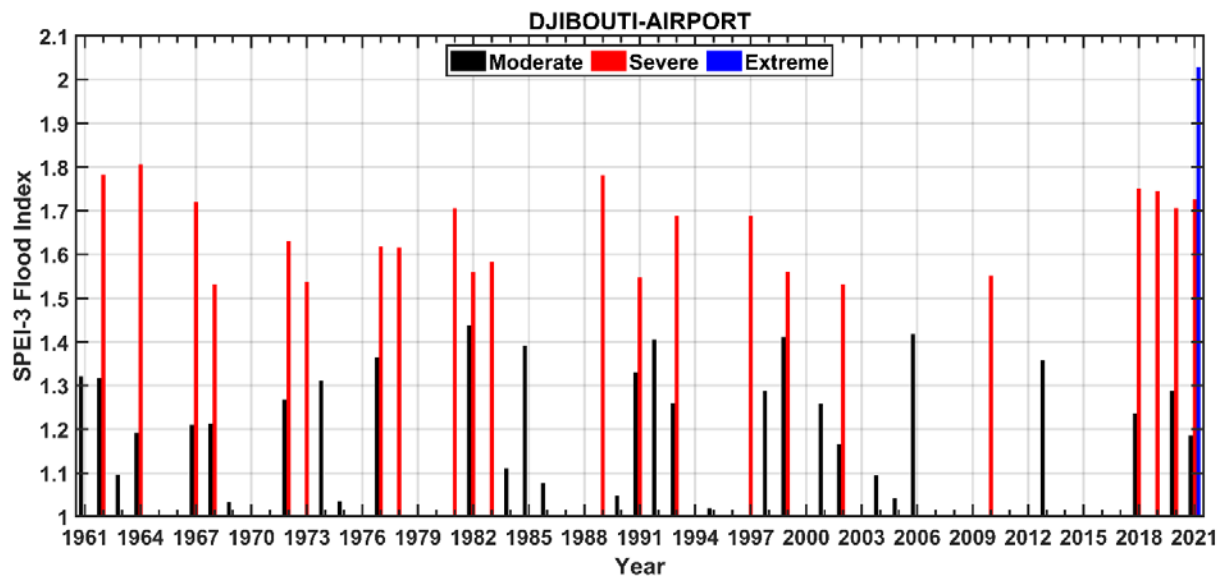

(a)

**Figure S3:** Temporal variation of SPI-3 (a) and SPEI-3 (b) for moderate, severe, and extreme weat events at Djibouti-airport from 1961 to 2021, as presented in Figure 7.

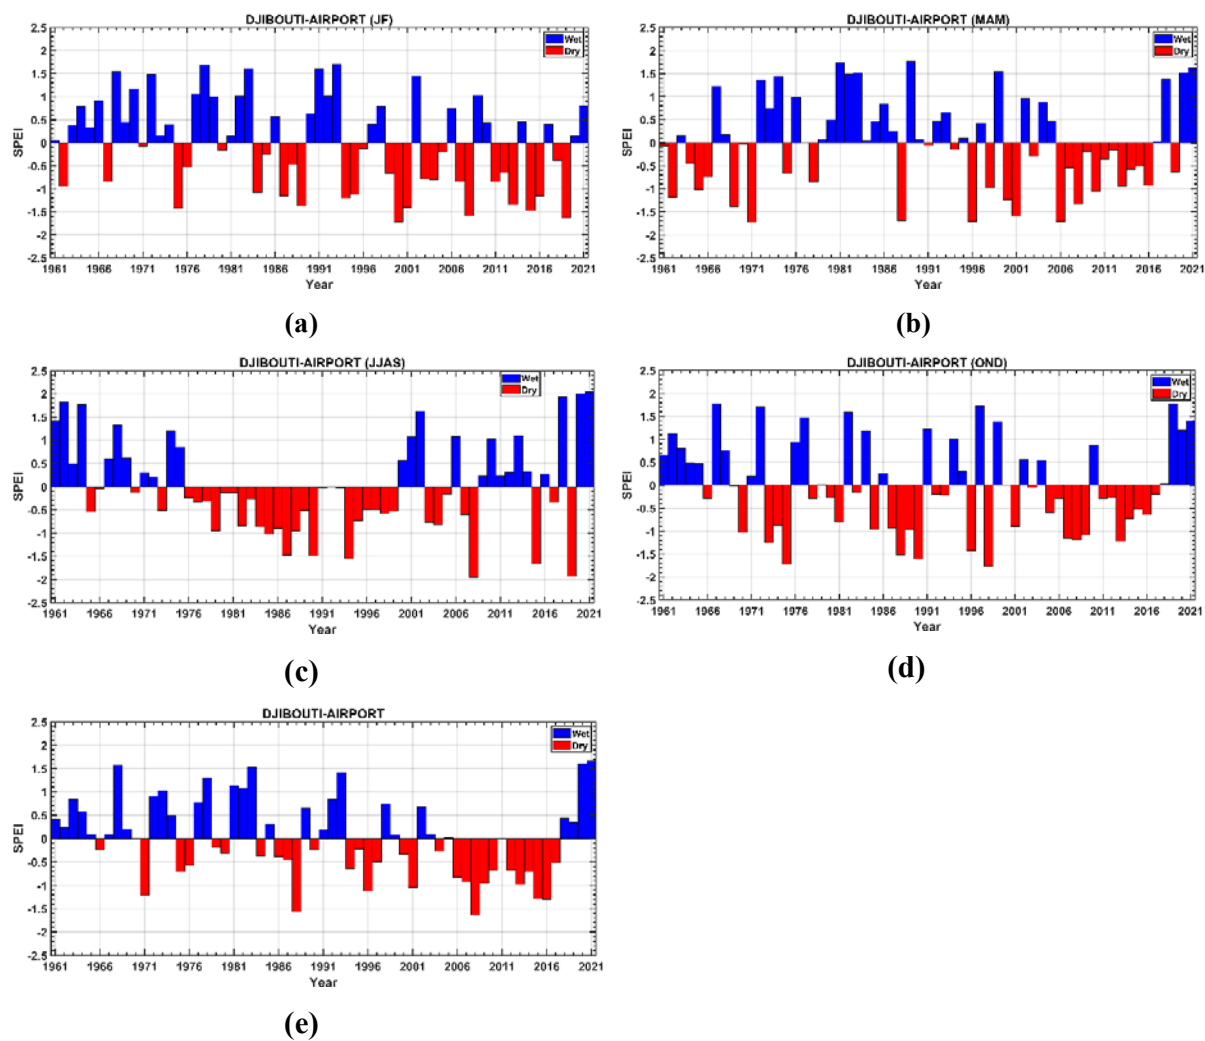

**Figure S4.** Seasonal (a) JF, (b) MAM, (c) JJAS, (d) OND and (e) annual variability of the SPEI index over the period 1961-2021 at the Djibouti Airport station.

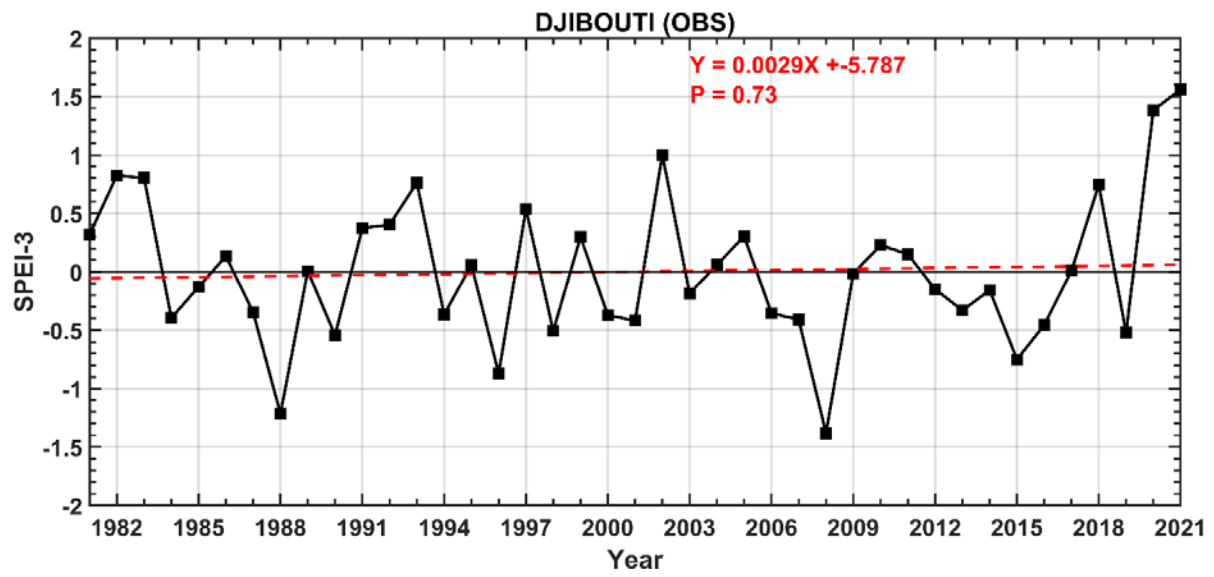

(a)

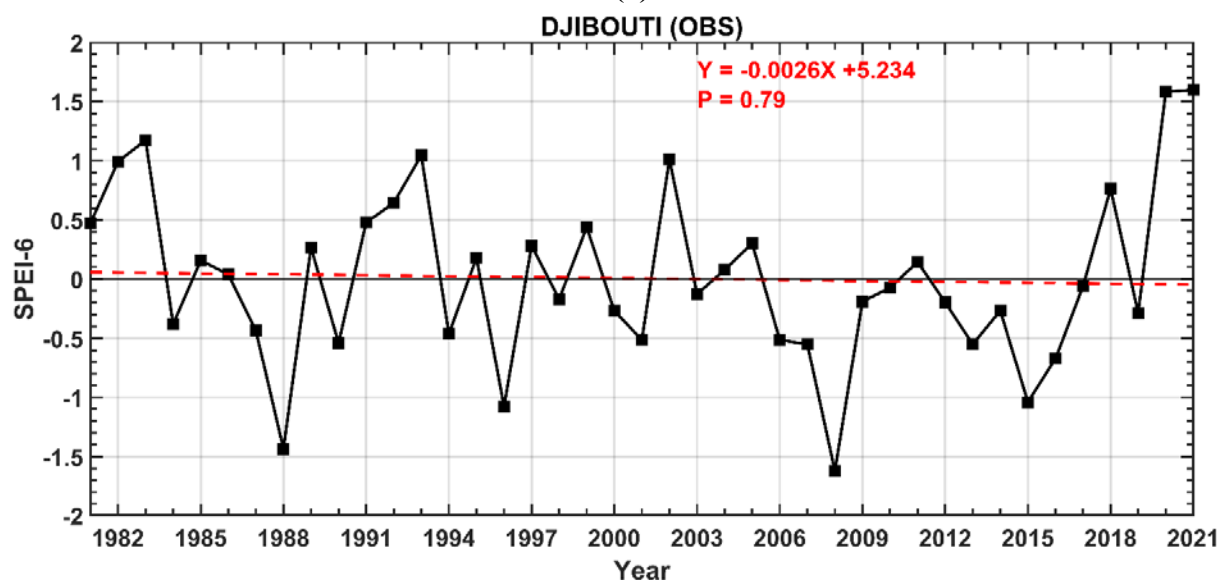

(b)

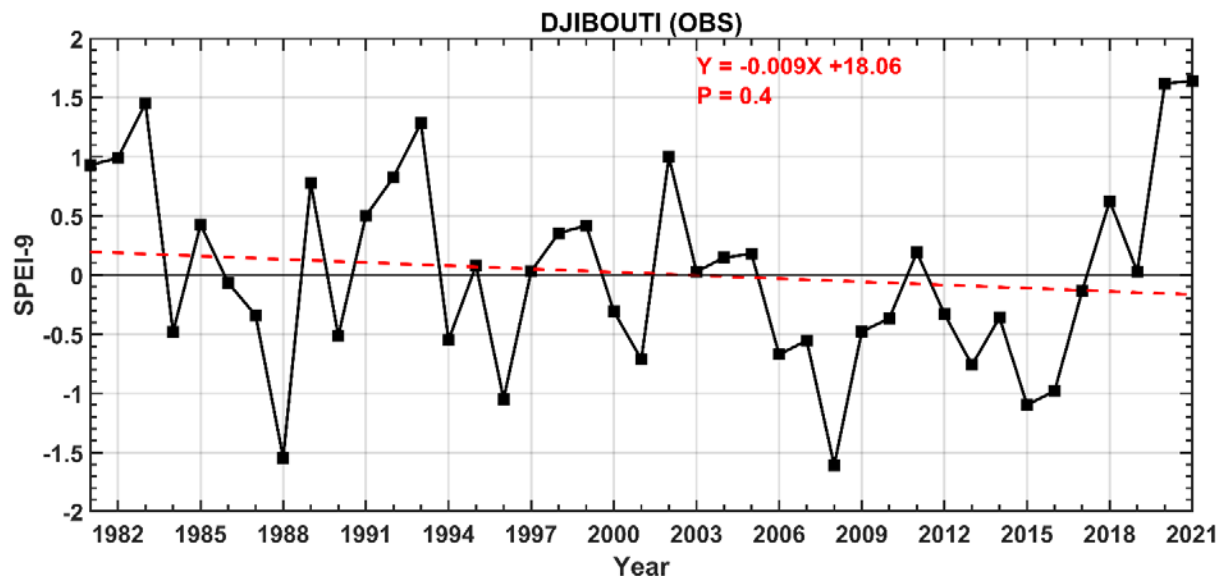

(c)

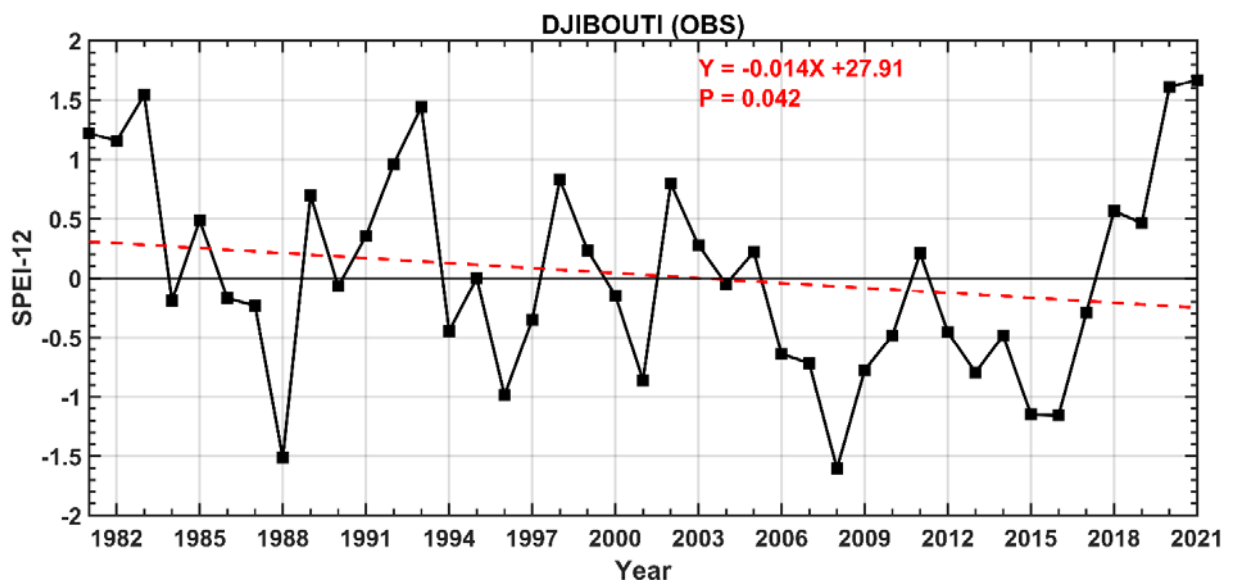

(d)

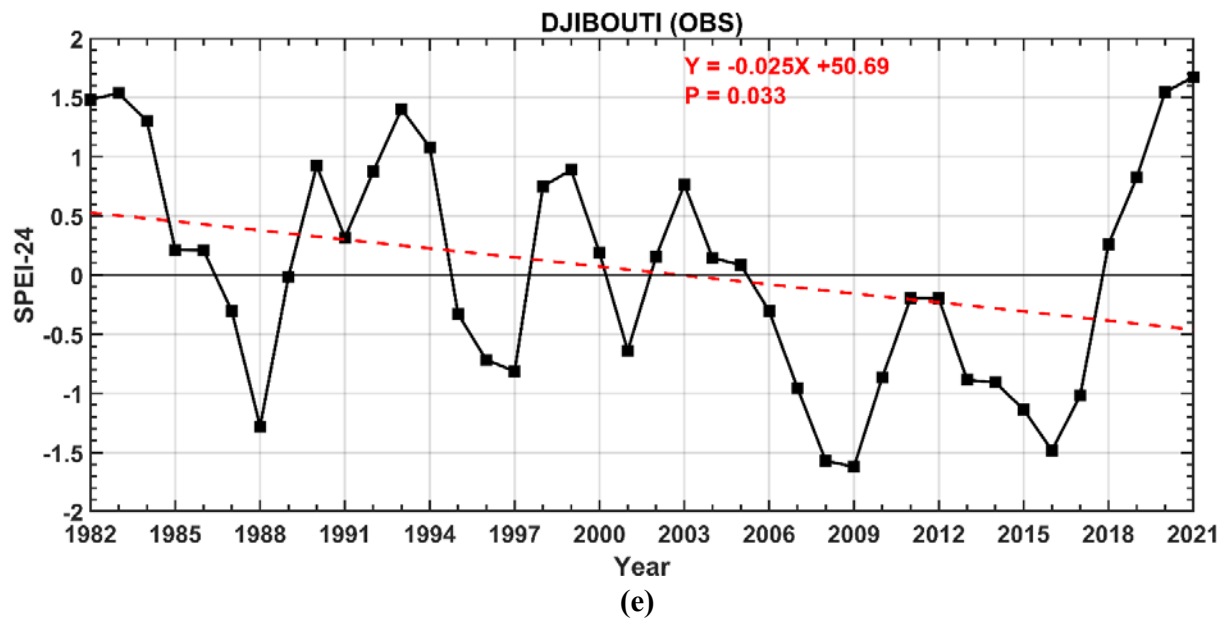

**Figure S5.** Interannual variations and linear trends of the annual mean of the SPEI (3, 6, 9, 12 and 24 months) indices at the Djibouti-airport observation data during 1981-2021.
